# Supplementary material for: PCSK9 Regulates Nox2-Mediated Platelet Activation via CD36 Receptor in Patients with Atrial Fibrillation
Source: PubMed Central journal article supplement (PMC7222182; doi:10.3390/antiox9040296), 2020-04-02
Supplement: antioxidants-09-00296-s001.pdf [file antioxidants-09-00296-s001.pdf]

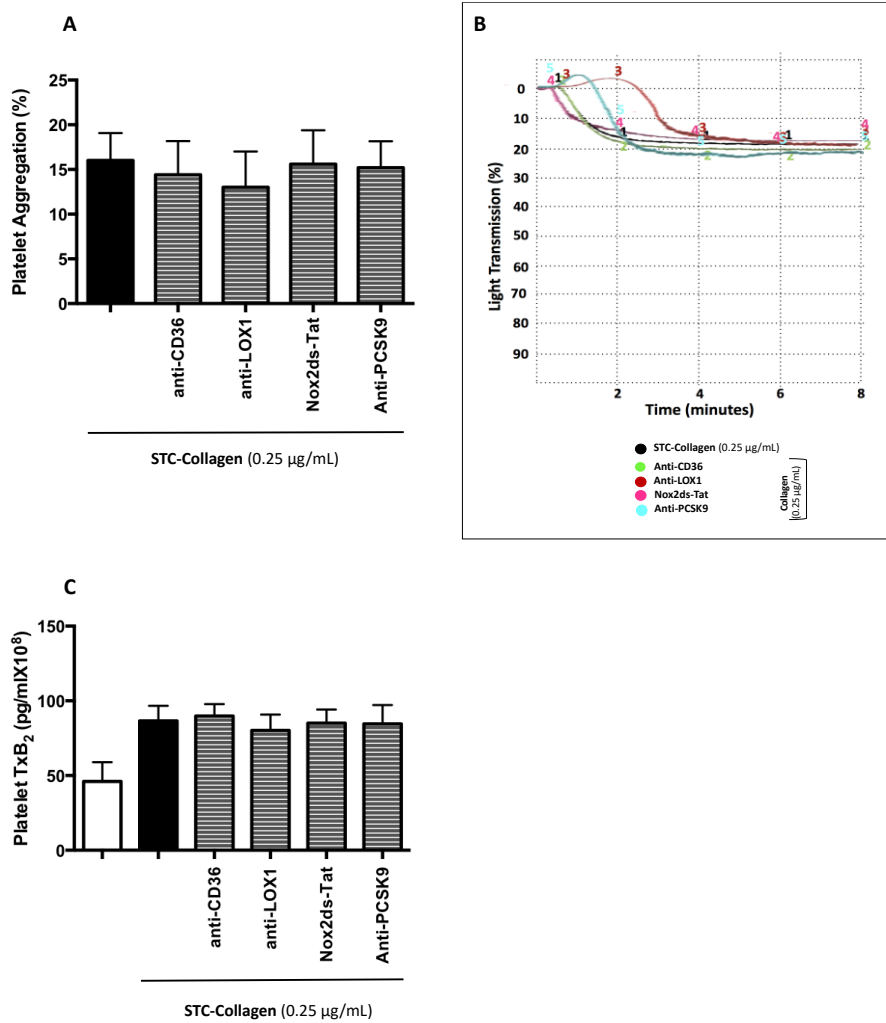

**Figure S1.** PCSK9 and platelet activation. Platelet aggregation (**A**) with relative representative tracing (**B**) and platelet TxB<sub>2</sub> (**C**) evaluated in platelet rich plasma (PRP) treated with anti-CD36, anti-LOX1, Nox2ds-tat and anti-PCSK9 in absence of PCSK9 and stimulated with STC of collagen (0.25  $\mu\text{g}/\text{mL}$ ) ( $n = 5$ ) ( $p = \text{ns}$  for paired analyses).
